# Supplementary material
Source: PubMed Central journal article supplement (PMC5514445)
Supplement: MCB.00063-17_zmb999101543s1.pdf [file MCB.00063-17_zmb999101543s1.pdf]

1 **Table S1. Peripheral blood analysis of Sf::*Keap1*-TKO mice**

|                            | Control    | Sf::Control | Sf:: <i>Keap1</i> -TKO | <i>P</i> * | <i>P</i> ** |
|----------------------------|------------|-------------|------------------------|------------|-------------|
| WBC ( $10^2/\mu\text{L}$ ) | 49 ± 8     | 57 ± 25     | 49 ± 19                | NS         | NS          |
| RBC ( $10^4/\mu\text{L}$ ) | 578 ± 47   | 444 ± 48    | 457 ± 86               | < 0.0003   | NS          |
| Hb (g/dL)                  | 8.7 ± 1.4  | 7.1 ± 0.7   | 7.5 ± 1.6              | < 0.02     | NS          |
| Hct (%)                    | 28.1 ± 4.1 | 22.9 ± 2.5  | 23.1 ± 4.7             | < 0.02     | NS          |
| MCV (fL)                   | 48.5 ± 3.8 | 51.6 ± 1.2  | 50.4 ± 1.6             | NS         | NS          |
| MCH (pg)                   | 15.0 ± 1.5 | 16.0 ± 0.6  | 16.4 ± 1.1             | NS         | NS          |
| MCHC (g/dL)                | 31.0 ± 1.2 | 31.1 ± 1.2  | 32.4 ± 1.4             | NS         | NS          |
| PLT ( $10^4/\mu\text{L}$ ) | 94 ± 12    | 65 ± 19     | 84 ± 23                | < 0.007    | NS          |

2

3 *P*\*, Control vs. Sf::Control; *P*\*\*, Sf::Control vs. Sf::*Keap1*-TKO

4 Values are presented as the means ± SD of Control (n = 6), Sf::Control (n = 8), and

5 Sf::*Keap1*-TKO (n = 6) mice. WBC, white blood cell; RBC, red blood cell; Hb, hemoglobin;

6 Hct, hematocrit; MCV, mean corpuscular volume; MCH, mean corpuscular hemoglobin;

7 MCHC, mean corpuscular hemoglobin concentration; PLT, platelet; NS, not significant.

8

9 **Table S2. Peripheral blood analysis of Sf::*Keap1*-MKO mice**

|                            | Control    | Sf::Control | Sf:: <i>Keap1</i> -MKO | <i>P</i> * | <i>P</i> ** |
|----------------------------|------------|-------------|------------------------|------------|-------------|
| WBC ( $10^2/\mu\text{L}$ ) | 56 ± 13    | 47 ± 24     | 64 ± 50                | NS         | NS          |
| RBC ( $10^4/\mu\text{L}$ ) | 555 ± 37   | 508 ± 125   | 452 ± 53               | NS         | NS          |
| Hb (g/dL)                  | 7.5 ± 0.7  | 7.4 ± 1.9   | 6.5 ± 0.9              | NS         | NS          |
| Hct (%)                    | 26.9 ± 2.1 | 26.7 ± 6.2  | 23.6 ± 3.2             | NS         | NS          |
| MCV (fL)                   | 48.5 ± 1.3 | 51.6 ± 1.9  | 52.1 ± 2.2             | < 0.04     | NS          |
| MCH (pg)                   | 13.6 ± 0.7 | 14.7 ± 0.8  | 14.3 ± 0.9             | NS         | NS          |
| MCHC (g/dL)                | 28.0 ± 0.8 | 27.7 ± 0.9  | 27.4 ± 0.6             | NS         | NS          |
| PLT ( $10^4/\mu\text{L}$ ) | 96 ± 35    | 74 ± 37     | 66 ± 36                | NS         | NS          |

10

11 *P*\*, Control vs. Sf::Control; *P*\*\*, Sf::Control vs. Sf::*Keap1*-MKO

12 Values are presented as the means ± SD of Control (n = 4), Sf::Control (n = 5), and

13 Sf::*Keap1*-MKO (n = 3) mice. WBC, white blood cell; RBC, red blood cell; Hb, hemoglobin;

14 Hct, hematocrit; MCV, mean corpuscular volume; MCH, mean corpuscular hemoglobin;

15 MCHC, mean corpuscular hemoglobin concentration; PLT, platelet; NS, not significant.

16

17 **Table S3. Peripheral blood analysis of Sf::Keap1-DKO mice**

|                           | Control    | Sf::Control | Sf::Keap1-DKO | <i>P</i> * | <i>P</i> ** |
|---------------------------|------------|-------------|---------------|------------|-------------|
| WBC (10 <sup>2</sup> /μL) | 51 ± 31    | 43 ± 25     | 31 ± 13       | NS         | NS          |
| RBC (10 <sup>4</sup> /μL) | 520 ± 55   | 452 ± 74    | 430 ± 75      | NS         | NS          |
| Hb (g/dL)                 | 7.4 ± 1.1  | 6.2 ± 1.5   | 6.8 ± 1.4     | NS         | NS          |
| Hct (%)                   | 25.2 ± 2.9 | 22.0 ± 4.1  | 22.0 ± 4.6    | NS         | NS          |
| MCV (fL)                  | 48.5 ± 3.8 | 48.6 ± 1.8  | 51.0 ± 2.4    | NS         | NS          |
| MCH (pg)                  | 14.3 ± 1.4 | 13.6 ± 1.4  | 15.8 ± 0.5    | NS         | < 0.03      |
| MCHC (g/dL)               | 29.3 ± 0.8 | 27.9 ± 1.9  | 31.0 ± 0.7    | NS         | < 0.03      |
| PLT (10 <sup>4</sup> /μL) | 87 ± 19    | 82 ± 17     | 81 ± 20       | NS         | NS          |

18

19 *P*\*, Control vs. Sf::Control; *P*\*\*, Sf::Control vs. Sf::Keap1-DKO

20 Values are presented as the means ± SD of Control (n = 4), Sf::Control (n = 4), and

21 Sf::Keap1-DKO (n = 4) mice. WBC, white blood cell; RBC, red blood cell; Hb, hemoglobin;

22 Hct, hematocrit; MCV, mean corpuscular volume; MCH, mean corpuscular hemoglobin;

23 MCHC, mean corpuscular hemoglobin concentration; PLT, platelet; NS, not significant.

24

25 **Table S4. Peripheral blood analysis of Sf mice**

|                            | WT-Veh     | WT-CDDO-Im | Sf-Veh     | Sf-CDDO-Im | <i>P</i> * | <i>P</i> ** |
|----------------------------|------------|------------|------------|------------|------------|-------------|
| WBC ( $10^2/\mu\text{L}$ ) | 37 ± 7     | 29 ± 5     | 30 ± 16    | 31 ± 16    | NS         | NS          |
| RBC ( $10^4/\mu\text{L}$ ) | 486 ± 46   | 451 ± 47   | 413 ± 48   | 437 ± 39   | < 0.02     | NS          |
| Hb (g/dL)                  | 6.5 ± 0.7  | 6.2 ± 0.6  | 5.5 ± 0.9  | 5.8 ± 0.8  | < 0.04     | NS          |
| Hct (%)                    | 24.2 ± 2.8 | 22.8 ± 2.3 | 20.2 ± 2.7 | 21.9 ± 3.1 | < 0.02     | NS          |
| MCV (fL)                   | 49.8 ± 3.0 | 50.6 ± 2.3 | 48.8 ± 1.9 | 50.0 ± 3.2 | NS         | NS          |
| MCH (pg)                   | 13.4 ± 0.9 | 13.7 ± 1.0 | 13.3 ± 1.4 | 13.1 ± 0.9 | NS         | NS          |
| MCHC (g/dL)                | 26.9 ± 1.4 | 27.2 ± 2.1 | 27.2 ± 3.2 | 26.4 ± 2.2 | NS         | NS          |
| PLT ( $10^4/\mu\text{L}$ ) | 80 ± 14    | 61 ± 6     | 61 ± 18    | 69 ± 14    | < 0.05     | NS          |

26

27 *P*\*, WT-Veh vs. Sf-Veh; *P*\*\*, Sf-Veh vs. Sf-CDDO-Im

28 Values are presented as the means ± SD of WT-Veh (n = 6), WT-CDDO-Im (n = 5), Sf-Veh (n

29 = 9), and Sf-CDDO-Im (n = 8) mice. WBC, white blood cell; RBC, red blood cell; Hb,

30 hemoglobin; Hct, hematocrit; MCV, mean corpuscular volume; MCH, mean corpuscular

31 hemoglobin; MCHC, mean corpuscular hemoglobin concentration; PLT, platelet; NS, not

32 significant.

33

34

35 **Table S5. Primer and probe sequences for RT-qPCR**

| Gene                      |         | Sequence                                   |
|---------------------------|---------|--------------------------------------------|
| <b>Mouse <i>Gapdh</i></b> | Forward | 5'-GAGATGATGACCCTTTTGGC-3'                 |
|                           | Reverse | 5'-GTCGTGGAGTCTACTGGTGTCTT-3'              |
| <b>Mouse <i>Ifng</i></b>  | Forward | 5'-CTTCTTCAGCAACAGCAAGGCGAA-3'             |
|                           | Reverse | 5'-GGGTTGTTGACCTCAAACCTTGGCA-3'            |
| <b>Mouse <i>Keap1</i></b> | Forward | 5'-CCCATGAGGCATCACCGTAG-3'                 |
|                           | Reverse | 5'-CATAGCCTCCGAGGACGTAG-3'                 |
|                           | Probe   | 5'-FAM-GGATTACTGTGCACCAGGGCAAG-TAMRA-3'    |
| <b>Mouse <i>Nqo1</i></b>  | Forward | 5'-AGCTGGAAGCTGCAGACCTG-3'                 |
|                           | Reverse | 5'-CCTTTCAGAAATGGCTGGCA-3'                 |
|                           | Probe   | 5'-FAM-ATTCAGTTCCCATTCAGTGGTTTGGG-TAMRA-3' |

36

37
